# Supplementary material for: Parkinson’s Disease Multimodal Complex Treatment (PD-MCT): Analysis of Therapeutic Effects and Predictors for Improvement
Source: PubMed Central journal article supplement (PMC7356837; doi:10.3390/jcm9061874), 2020-06-16
Supplement: jcm-09-01874-s001.pdf [file jcm-09-01874-s001.pdf]

Article

# Parkinson's disease Multimodal Complex Treatment (PD-MCT): Analysis of Therapeutic Effects and Predictors for Improvement

Elke Hartelt <sup>1</sup>, Raphael Scherbaum <sup>1</sup>, Manuel Kinkel <sup>2</sup>, Ralf Gold <sup>1,3</sup>, Siegfried Muhlack <sup>1</sup> and Lars Tönges <sup>1,3,\*</sup>

<sup>1</sup> Department of Neurology, St. Josef-Hospital, Ruhr-University Bochum, 44791 Bochum, Germany; elke.hartelt@rub.de (E.H.); raphael.scherbaum@rub.de (R.S.); ralf.gold@rub.de (R.G.); siegfried.muhlack@rub.de (S.M.)

<sup>2</sup> Psychiatrisches Gutachtenbüro, 44795 Bochum, Germany; manuel.kinkel@gmx.de

<sup>3</sup> Neurodegeneration Research, Protein Research Unit Ruhr (PURE), Ruhr-University Bochum, 44801 Bochum, Germany

\* Correspondence: lars.toenges@rub.de

## Supplementary Materials

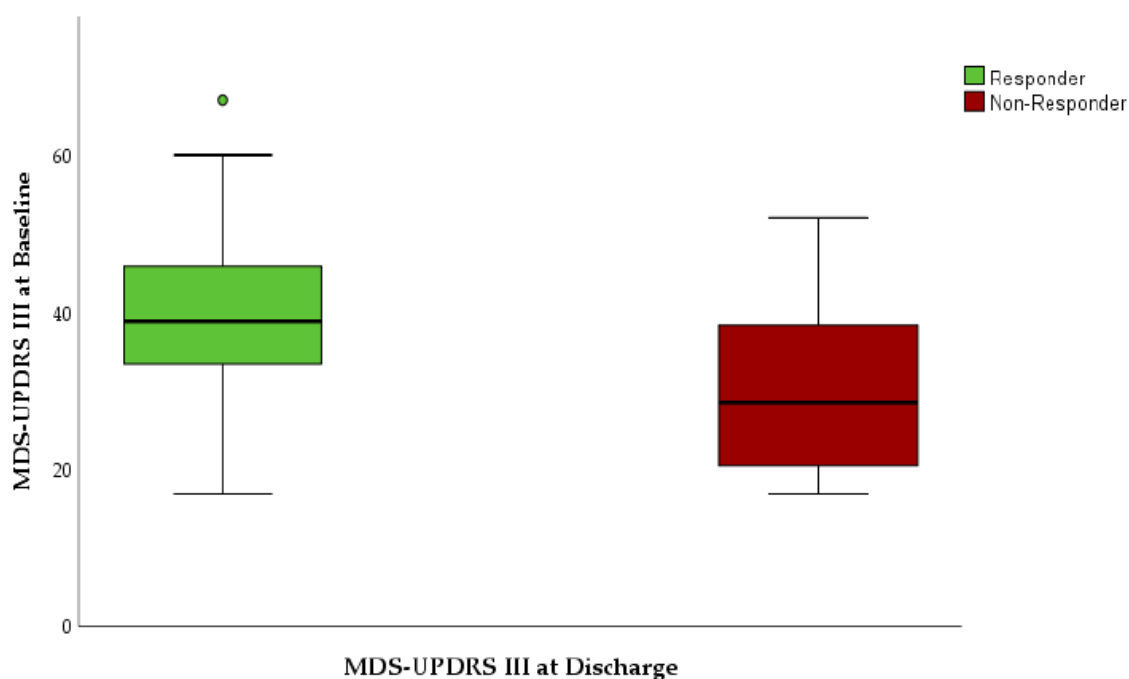

**Figure S1.** Comparison of MDS-UPDRS III Responders and Non-Responders. Significant mean difference in MDS-UPDRS III Responders and Non-Responders regarding BL motor level. Responders are defined as at least improvement from BL, no change is defined as Non-Responder.

**Table S1.** Details on the Components of Parkinson’s Disease Multimodal Complex Treatment (PD-MCT) [15].

| Therapy intervention         | Description                                                                                                                                                                                                                                                                                                                                                        |
|------------------------------|--------------------------------------------------------------------------------------------------------------------------------------------------------------------------------------------------------------------------------------------------------------------------------------------------------------------------------------------------------------------|
| Physiotherapy                | <ul style="list-style-type: none"><li>- Proprioceptive training</li><li>- Gait analysis</li><li>- Posture correction</li><li>- Fall prevention/ balance training</li><li>- Amplitude training</li><li>- Education on self-executed home training</li><li>- General strengthening</li></ul>                                                                         |
| Occupational Therapy         | <ul style="list-style-type: none"><li>- Amplitude training (LSVT-BIG)</li><li>- Fine motor skill training</li><li>- Writing training</li><li>- Everyday life-oriented therapy</li><li>- Development of compensation strategies</li><li>- Fall prevention/ balance training</li><li>- Relaxation techniques</li><li>- Sensitivity and perception training</li></ul> |
| Speech and Language Therapy  | <ul style="list-style-type: none"><li>- Articulation</li><li>- Swallowing training</li><li>- Language cognition</li><li>- Psychosocial support</li></ul>                                                                                                                                                                                                           |
| Exercise/ equipment training | <ul style="list-style-type: none"><li>- General strengthening</li><li>- Cardiopulmonary endurance training</li></ul>                                                                                                                                                                                                                                               |
| Physical therapy             | <ul style="list-style-type: none"><li>- Massages</li><li>- Thermotherapy</li><li>- Relaxation therapy</li></ul>                                                                                                                                                                                                                                                    |
| Other                        | <ul style="list-style-type: none"><li>- Drug adjustment</li><li>- Neuropsychological assessment of emotional, cognitive and psychosocial functioning</li><li>- Specialized PD Nursing</li><li>- Social services support</li><li>- Advice on medial aids</li></ul>                                                                                                  |

**Table S2.** Intensity of Therapy Interventions during Parkinson’s Disease Multimodal Complex Treatment (PD-MCT).

| Therapy intervention            | Value | SD   | Min  | Max  |
|---------------------------------|-------|------|------|------|
| Physiotherapy [h]               | 4.44  | 0.85 | 1.33 | 5.67 |
| Occupational therapy [h]        | 3.48  | 0.63 | 1.50 | 5.00 |
| Speech and language therapy [h] | 2.44  | 1.09 | 0.75 | 4.75 |
| Exercise/equipment training [h] | 3.81  | 1.62 | 0.00 | 7.00 |
| Massages [h]                    | 3.57  | 1.69 | 0.00 | 7.33 |

Amount of performed therapy hours during PD-MCT as mean value. If not indicated otherwise n=44. *h* hours, *SD* standard deviation, *min* Minimum, *max* Maximum.

**Table S3.** Spearman’s Rank Correlation of Benefits from Baseline to Discharge in Clinical Motor Parameters with PD-MCT Therapy Hours.

| <i>Benefit variables</i> | PT                   |              | Exercise             |          | Physical Therapy     |          | OT                   |              | SLT                  |          | LED <sub>diff</sub>  |              |
|--------------------------|----------------------|--------------|----------------------|----------|----------------------|----------|----------------------|--------------|----------------------|----------|----------------------|--------------|
|                          | <i>r<sub>s</sub></i> | <i>p</i>     | <i>r<sub>s</sub></i> | <i>p</i> | <i>r<sub>s</sub></i> | <i>p</i> | <i>r<sub>s</sub></i> | <i>p</i>     | <i>r<sub>s</sub></i> | <i>p</i> | <i>r<sub>s</sub></i> | <i>p</i>     |
| MDS-UPDRS I              | 0.017                | 0.915        | -0.183               | 0.257    | -0.110               | 0.499    | 0.                   | 0.799        | 0.151                | 0.353    | -0.074               | 0.639        |
| MDS-UPDRS II             | 0.039                | 0.813        | -0.005               | 0.977    | 0.009                | 0.956    | -                    | 0.719        | -0.061               | 0.706    | <b>-0.359</b>        | <b>0.018</b> |
| MDS-UPDRS III            | 0.074                | 0.648        | -0.008               | 0.960    | 0.064                | 0.701    | 0.                   | 0.943        | 0.053                | 0.749    | -0.204               | 0.201        |
| III - tremor             | -0.118               | 0.468        | -0.232               | 0.149    | -0.081               | 0.620    | -                    | 0.622        | 0.115                | 0.479    | -0.080               | 0.610        |
| III - non-tremor         | 0.091                | 0.575        | 0.113                | 0.486    | 0.071                | 0.664    | 0.                   | 0.808        | -0.017               | 0.917    | -0.118               | 0.451        |
| MDS-UPDRS IV             | 0.184                | 0.257        | 0.094                | 0.563    | -0.089               | 0.584    | -                    | 0.144        | -0.065               | 0.689    | 0.015                | 0.926        |
| TUG                      | -0.011               | 0.947        | 0.163                | 0.320    | 0.119                | 0.469    | <b>0.</b>            | <b>0.019</b> | -0.168               | 0.308    | 0.024                | 0.881        |
| BBS                      | 0.241                | 0.140        | -0.075               | 0.649    | -0.064               | 0.696    | -                    | 0.053        | -0.221               | 0.176    | 0.204                | 0.195        |
| PPT                      | <b>-0.352</b>        | <b>0.028</b> | 0.106                | 0.523    | 0.080                | 0.630    | -                    | 0.522        | -0.105               | 0.523    | 0.106                | 0.506        |
| PPT <sub>rh</sub>        | <b>-0.450</b>        | <b>0.004</b> | 0.011                | 0.949    | 0.108                | 0.514    | -                    | 0.938        | -0.097               | 0.558    | 0.021                | 0.897        |

*r<sub>s</sub>* Spearman’s rank correlation coefficient rho, *MDS-UPDRS* Movement Disorder Society Unified Parkinson’s Disease Rating Scale Parts I-IV, *TUG* Timed Up and Go, *BBS* Berg Balance Scale, *PPT* Perdue Pegboard Test, *PPT<sub>rh</sub>* Perdue Pegboard Test - right hand, *PT* physiotherapy, *OT* occupational therapy, *SLT* speech and language therapy, *LED<sub>diff</sub>* Difference in Levodopa-equivalent dose from baseline to discharge. N=40 for MDS-UPDRS scales I, II, IV, n=39 for MDS-UPDRS III, BBS, PPT, PPT<sub>rh</sub>. Significant values are marked in bold.

**Table 4.** Spearman’s Rank Correlation of Baseline Parameters and Multimodal Complex Treatment Hours with Motor Variables.

| Baseline parameters    | MDS-UPDRS I   |              | MDS-UPDRS II  |              | MDS-UPDRS III |              | MDS-UPDRS III- Tremor |              | MDS-UPDRS III - Nontremor |              |
|------------------------|---------------|--------------|---------------|--------------|---------------|--------------|-----------------------|--------------|---------------------------|--------------|
|                        | $r_s$         | $p$          | $r_s$         | $p$          | $r_s$         | $p$          | $r_s$                 | $p$          | $r_s$                     | $p$          |
|                        | Age           | 0.094        | 0.532         | <b>0.309</b> | <b>0.034</b>  | <b>0.382</b> | <b>0.008</b>          | 0.178        | 0.231                     | <b>0.366</b> |
| Age at Diagnosis       | -0.072        | 0.632        | 0.118         | 0.430        | <b>0.299</b>  | <b>0.041</b> | 0.181                 | 0.223        | <b>0.290</b>              | <b>0.048</b> |
| Disease duration       | 0.155         | 0.299        | <b>0.304</b>  | <b>0.038</b> | 0.159         | 0.286        | -0.007                | 0.961        | 0.139                     | 0.353        |
| LED                    | 0.036         | 0.812        | 0.130         | 0.383        | 0.005         | 0.973        | -0.190                | 0.202        | 0.020                     | 0.894        |
| MDS-UPDRS I            | -             | -            | <b>0.501</b>  | <b>0.000</b> | 0.141         | 0.343        | -0.104                | 0.487        | 0.192                     | 0.195        |
| MDS-UPDRS II           | <b>0.501</b>  | <b>0.000</b> | -             | -            | <b>0.620</b>  | <b>0.000</b> | 0.257                 | 0.081        | <b>0.613</b>              | <b>0.000</b> |
| MDS-UPDRS III          | 0.141         | 0.343        | <b>0.620</b>  | <b>0.000</b> | -             | -            | <b>0.497</b>          | <b>0.000</b> | <b>0.952</b>              | <b>0.000</b> |
| MDS-UPDRS IV           | 0.238         | 0.107        | 0.121         | 0.419        | -0.047        | 0.755        | -0.168                | 0.258        | -0.027                    | 0.855        |
| TUG, n=45              | <b>0.295</b>  | <b>0.049</b> | <b>0.677</b>  | <b>0.000</b> | <b>0.483</b>  | <b>0.001</b> | 0.220                 | 0.147        | <b>0.491</b>              | <b>0.001</b> |
| BBS, n=44              | <b>-0.481</b> | <b>0.001</b> | <b>-0.597</b> | <b>0.000</b> | <b>-0.417</b> | <b>0.005</b> | -0.029                | 0.851        | <b>-0.483</b>             | <b>0.000</b> |
| PPT, n=44              | -0.103        | 0.507        | <b>-0.514</b> | <b>0.000</b> | <b>-0.591</b> | <b>0.000</b> | <b>-0.324</b>         | <b>0.032</b> | <b>-0.542</b>             | <b>0.000</b> |
| BDI-II, n=46           | <b>0.527</b>  | <b>0.000</b> | 0.055         | 0.718        | -0.068        | 0.652        | -0.095                | 0.528        | -0.067                    | 0.660        |
| HAMD-17, n=46          | <b>0.570</b>  | <b>0.000</b> | 0.211         | 0.160        | -0.005        | 0.972        | -0.080                | 0.598        | -0.011                    | 0.941        |
| AES, n=46              | 0.264         | 0.076        | <b>0.312</b>  | <b>0.035</b> | <b>0.301</b>  | <b>0.042</b> | -0.177                | 0.238        | <b>0.385</b>              | <b>0.008</b> |
| MoCA                   | -0.252        | 0.088        | -0.234        | 0.113        | <b>-0.403</b> | <b>0.005</b> | 0.047                 | 0.756        | <b>-0.432</b>             | <b>0.002</b> |
| PT, n=44               | -0.215        | 0.161        | -0.001        | 0.994        | -0.229        | 0.135        | -0.051                | 0.744        | -0.219                    | 0.152        |
| Exercise, n=44         | <b>-0.396</b> | <b>0.008</b> | <b>-0.436</b> | <b>0.003</b> | <b>-0.415</b> | <b>0.005</b> | 0.172                 | 0.263        | <b>-0.521</b>             | <b>0.000</b> |
| Physical Therapy, n=44 | <b>-0.380</b> | <b>0.011</b> | <b>-0.499</b> | <b>0.001</b> | <b>-0.334</b> | <b>0.027</b> | 0.134                 | 0.387        | <b>-0.444</b>             | <b>0.003</b> |
| OT, n=44               | -0.068        | 0.658        | -0.135        | 0.381        | <b>-0.304</b> | <b>0.045</b> | -0.163                | 0.290        | <b>-0.302</b>             | <b>0.047</b> |

**Table S4. Cont.**

| Baseline parameters    | MDS-<br>UPDRS IV    |              | TUG                             |              | BBS                       |              | PPT                              |              |
|------------------------|---------------------|--------------|---------------------------------|--------------|---------------------------|--------------|----------------------------------|--------------|
|                        | $r_s$               | $p$          | $r_s$                           | $p$          | $r_s$                     | $p$          | $r_s$                            | $p$          |
| Age                    | -0.167              | 0.261        | <b>0.392<sup>e</sup></b>        | <b>0.008</b> | -0.248 <sup>d</sup>       | 0.105        | <b><u>-0.614<sup>d</sup></u></b> | <b>0.000</b> |
| Age at Diagnosis       | <b>-0.420</b>       | <b>0.003</b> | <b>0.310<sup>e</sup></b>        | <b>0.038</b> | -0.129 <sup>d</sup>       | 0.405        | <b>-0.477<sup>d</sup></b>        | <b>0.001</b> |
| Disease duration       | <b><u>0.512</u></b> | <b>0.000</b> | 0.045 <sup>e</sup>              | 0.768        | -0.115 <sup>d</sup>       | 0.457        | -0.239 <sup>d</sup>              | 0.118        |
| LED                    | <b>0.465</b>        | <b>0.001</b> | -0.020 <sup>e</sup>             | 0.898        | -0.132 <sup>d</sup>       | 0.393        | -0.048 <sup>d</sup>              | 0.758        |
| MDS-UPDRS I            | 0.238               | 0.107        | 0.295 <sup>e</sup>              | 0.049        | <b>-0.481<sup>d</sup></b> | <b>0.001</b> | -0.103 <sup>d</sup>              | 0.507        |
| MDS-UPDRS II           | 0.121               | 0.419        | <b><u>0.677<sup>e</sup></u></b> | <b>0.000</b> | <b>-0.597<sup>d</sup></b> | <b>0.000</b> | <b>-0.514<sup>d</sup></b>        | <b>0.000</b> |
| MDS-UPDRS III          | -0.047              | 0.755        | <b>0.483<sup>e</sup></b>        | <b>0.001</b> | <b>-0.417<sup>d</sup></b> | <b>0.005</b> | <b>-0.519<sup>d</sup></b>        | <b>0.000</b> |
| MDS-UPDRS IV           | -                   | -            | -0.135 <sup>e</sup>             | 0.376        | -0.112 <sup>d</sup>       | 0.469        | 0.033 <sup>d</sup>               | 0.831        |
| TUG, n=45              | -0.135              | 0.376        | -                               | -            | <b>-0.709<sup>d</sup></b> | <b>0.000</b> | <b>-0.626<sup>c</sup></b>        | <b>0.000</b> |
| BBS, n=44              | -0.112              | 0.469        | <b>-0.709<sup>d</sup></b>       | <b>0.000</b> | -                         | -            | <b>0.464<sup>b</sup></b>         | <b>0.002</b> |
| PPT, n=44              | 0.033               | 0.831        | <b>-0.626<sup>c</sup></b>       | <b>0.000</b> | <b>0.464<sup>b</sup></b>  | <b>0.002</b> | -                                | -            |
| BDI-II, n=46           | 0.122               | 0.421        | -0.024 <sup>e</sup>             | 0.878        | -0.127 <sup>d</sup>       | 0.412        | <b>0.337<sup>d</sup></b>         | <b>0.026</b> |
| HAMD-17, n=46          | 0.161               | 0.286        | 0.065 <sup>e</sup>              | 0.672        | 0.039 <sup>d</sup>        | 0.803        | 0.236 <sup>d</sup>               | 0.122        |
| AES, n=46              | -0.020              | 0.890        | <b>0.343<sup>e</sup></b>        | <b>0.021</b> | <b>-0.430<sup>d</sup></b> | <b>0.004</b> | <b>-0.346<sup>d</sup></b>        | <b>0.021</b> |
| MoCA                   | -0.027              | 0.856        | -0.197 <sup>e</sup>             | 0.195        | 0.266 <sup>d</sup>        | 0.081        | <b>0.391<sup>d</sup></b>         | <b>0.009</b> |
| PT, n=44               | -0.130              | 0.400        | -0.210 <sup>b</sup>             | 0.182        | 0.111 <sup>a</sup>        | 0.491        | <b>0.362<sup>a</sup></b>         | <b>0.020</b> |
| Exercise, n=44         | -0.240              | 0.116        | <b>-0.494<sup>b</sup></b>       | <b>0.001</b> | <b>0.485<sup>a</sup></b>  | <b>0.001</b> | <b>0.403<sup>a</sup></b>         | <b>0.009</b> |
| Physical Therapy, n=44 | 0.011               | 0.946        | <b>-0.396<sup>b</sup></b>       | <b>0.010</b> | 0.248 <sup>a</sup>        | 0.117        | 0.283 <sup>a</sup>               | 0.073        |
| OT, n=44               | <b>0.436</b>        | <b>0.003</b> | <b>-0.361<sup>b</sup></b>       | <b>0.019</b> | 0.203 <sup>a</sup>        | 0.202        | 0.205 <sup>a</sup>               | 0.198        |

$r_s$  Spearman's rank correlation coefficient rho, *MDS-UPDRS* Movement Disorder Society Unified Parkinson's Disease Rating Scale Parts I-IV, *TUG* Timed Up and Go, *BBS* Berg Balance Scale, *PPT* Perdue Pegboard Test, *PT* physiotherapy, *OT* occupational therapy, *LED* levodopa equivalent dose, *BDI-II* revised Beck Depression Inventory, *HAMD* Hamilton Rating Scale for Depression, *AES* Apathy Evaluation Scale, *MoCA* Montreal Cognitive Assessment, if not indicated otherwise n=47, <sup>a</sup> n=41, <sup>b</sup> n=42, <sup>c</sup> n=43, <sup>d</sup> n=44, <sup>e</sup> n=45, significant values are marked in bold, correlation coefficients > 0.5 are underlined.

**Table S5.** Predictors of Treatment Response at Discharge.

| Response measure | Predictor            | Predictor categories | OR          | CI   |       | RR   | CI   |       | p- value     |
|------------------|----------------------|----------------------|-------------|------|-------|------|------|-------|--------------|
|                  |                      |                      |             | LB   | UB    |      | LB   | UB    |              |
| MDS-UPDRS I      | Age [y]              | <70/≥70              | 0.94        | 0.24 | 3.74  | 0.99 | 0.69 | 1.40  | 1.000        |
|                  | Sex                  | male/female          | 1.07        | 0.27 | 4.25  | 1.02 | 0.71 | 1.45  | 1.000        |
|                  | H&Y                  | <3/≥3                | 0.57        | 0.14 | 2.34  | 0.87 | 0.61 | 1.23  | 0.501        |
|                  | Disease duration [y] | <8/≥8                | 2.25        | 0.55 | 9.25  | 1.23 | 0.86 | 1.76  | 0.310        |
|                  | LED [mg]             | <595/≥595            | 2.25        | 0.55 | 9.25  | 1.23 | 0.86 | 1.76  | 0.310        |
|                  | MDS-UPDRS I          | <11/≥11              | 0.44        | 0.11 | 1.76  | 0.80 | 0.54 | 1.19  | 0.295        |
|                  | MDS-UPDRS II         | <13/≥13              | 1.83        | 0.41 | 8.20  | 1.16 | 0.82 | 1.62  | 0.494        |
|                  | MDS-UPDRS III        | <33/≥33              | 3.97        | 0.74 | 21.35 | 1.35 | 0.97 | 1.88  | 0.154        |
|                  | MDS-UPDRS IV         | <5/≥5                | 0.83        | 0.21 | 3.29  | 0.96 | 0.67 | 1.36  | 1.000        |
|                  | PDQ-39               | <30/≥30              | 1.59        | 0.40 | 6.41  | 1.13 | 0.77 | 1.67  | 0.719        |
|                  | BDI-II               | <14/≥14              | 1.26        | 0.30 | 5.30  | 1.06 | 0.72 | 1.57  | 1.000        |
|                  | AES                  | <11/≥11              | 1.26        | 0.30 | 5.30  | 1.06 | 0.72 | 1.57  | 1.000        |
|                  | MoCA                 | ≥26/<26              | 1.21        | 0.26 | 5.56  | 1.05 | 0.73 | 1.52  | 1.000        |
|                  | PT [h]               | ≤4.5/>4.5            | 1.06        | 0.27 | 4.19  | 1.02 | 0.72 | 1.44  | 1.000        |
|                  | Exercise [h]         | <4.5/≥4.5            | 0.93        | 0.24 | 3.70  | 0.98 | 0.69 | 1.40  | 1.000        |
|                  | OT [h]               | ≤3.5/>3.5            | 1.54        | 0.39 | 6.12  | 1.12 | 0.78 | 1.60  | 0.728        |
| SLT [h]          | ≤2.5/>2.5            | 1.98                 | 0.48        | 8.13 | 1.19  | 0.83 | 1.69 | 0.488 |              |
| LED increase     | no/yes               | 1.21                 | 0.26        | 5.56 | 1.05  | 0.73 | 1.51 | 1.000 |              |
| MDS-UPDRS II     | Age [y]              | <70/≥70              | 1.94        | 0.50 | 7.49  | 1.20 | 0.82 | 1.77  | 0.497        |
|                  | Sex                  | male/female          | 0.87        | 0.23 | 3.34  | 0.96 | 0.66 | 1.39  | 1.000        |
|                  | H&Y                  | <3/≥3                | 1.21        | 0.32 | 4.61  | 1.06 | 0.73 | 1.54  | 1.000        |
|                  | Disease duration [y] | <8/≥8                | 4.75        | 1.07 | 21.14 | 1.51 | 1.01 | 2.27  | 0.045        |
|                  | LED [mg]             | <595/≥595            | 4.75        | 1.07 | 21.14 | 1.51 | 1.01 | 2.27  | 0.045        |
|                  | MDS-UPDRS I          | <11/≥11              | 0.88        | 0.23 | 3.43  | 0.97 | 0.66 | 1.42  | 1.000        |
|                  | MDS-UPDRS II         | <13/≥13              | 2.17        | 0.49 | 9.60  | 1.22 | 0.85 | 1.74  | 0.484        |
|                  | MDS-UPDRS III        | <33/≥33              | 1.44        | 0.36 | 5.84  | 1.11 | 0.77 | 1.60  | 0.735        |
|                  | MDS-UPDRS IV         | <5/≥5                | 0.67        | 0.17 | 2.57  | 0.90 | 0.62 | 1.30  | 0.736        |
|                  | PDQ-39               | <30/≥30              | 3.42        | 0.86 | 13.67 | 1.45 | 0.91 | 2.31  | 0.092        |
|                  | BDI-II               | <14/≥14              | 1.75        | 0.44 | 6.98  | 1.18 | 0.76 | 1.83  | 0.482        |
|                  | AES                  | <11/≥11              | 1.75        | 0.44 | 6.98  | 1.18 | 0.76 | 1.83  | 0.482        |
|                  | MoCA                 | ≥26/<26              | 0.49        | 0.12 | 1.98  | 0.80 | 0.50 | 1.29  | 0.460        |
|                  | PT [h]               | ≤4.5/>4.5            | 2.13        | 0.53 | 8.58  | 1.23 | 0.85 | 1.78  | 0.327        |
|                  | Exercise [h]         | <4.5/≥4.5            | 1.15        | 0.30 | 4.44  | 1.04 | 0.72 | 1.51  | 1.000        |
|                  | OT [h]               | ≤3.5/>3.5            | 0.28        | 0.06 | 1.21  | 0.72 | 0.49 | 1.04  | 0.099        |
| SLT [h]          | ≤2.5/>2.5            | 0.59                 | 0.15        | 2.27 | 0.86  | 0.59 | 1.26 | 0.510 |              |
| LED increase     | no/yes               | 0.29                 | 0.07        | 1.20 | 0.67  | 0.40 | 1.15 | 0.137 |              |
| MDS-UPDRS III    | Age [y]              | <70/≥70              | 1.25        | 0.36 | 4.32  | 1.09 | 0.68 | 1.73  | 0.761        |
|                  | Sex                  | male/female          | 2.19        | 0.62 | 7.70  | 1.35 | 0.82 | 2.21  | 0.341        |
|                  | H&Y                  | <3/≥3                | 0.36        | 0.10 | 1.34  | 0.70 | 0.44 | 1.11  | 0.206        |
|                  | Disease duration [y] | <8/≥8                | 0.72        | 0.21 | 2.50  | 0.89 | 0.56 | 1.41  | 0.755        |
|                  | LED [mg]             | <595/≥595            | 1.08        | 0.31 | 3.71  | 1.03 | 0.65 | 1.63  | 1.000        |
|                  | MDS-UPDRS I          | <11/≥11              | 1.15        | 0.32 | 4.08  | 1.05 | 0.66 | 1.67  | 1.000        |
|                  | MDS-UPDRS II         | <13/≥13              | 0.98        | 0.27 | 3.52  | 0.99 | 0.62 | 1.60  | 1.000        |
|                  | MDS-UPDRS III        | <33/≥33              | <b>0.13</b> | 0.03 | 0.52  | 0.44 | 0.22 | 0.85  | <b>0.004</b> |
|                  | MDS-UPDRS IV         | <5/≥5                | 1.08        | 0.31 | 3.71  | 1.03 | 0.65 | 1.63  | 1.000        |
|                  | PDQ-39               | <30/≥30              | 1.02        | 0.28 | 3.66  | 1.01 | 0.63 | 1.62  | 1.000        |
|                  | BDI-II               | <14/≥14              | 0.57        | 0.14 | 2.24  | 0.82 | 0.52 | 1.29  | 0.512        |
|                  | AES                  | <11/≥11              | 0.91        | 0.24 | 3.42  | 0.97 | 0.60 | 1.57  | 1.000        |
|                  | MoCA                 | ≥26/<26              | 0.23        | 0.06 | 0.90  | 0.52 | 0.26 | 1.08  | 0.043        |
|                  | PT [h]               | ≤4.5/>4.5            | 1.80        | 0.51 | 6.34  | 1.24 | 0.78 | 1.96  | 0.528        |
|                  | Exercise [h]         | <4.5/≥4.5            | 1.03        | 0.30 | 3.57  | 1.01 | 0.64 | 1.60  | 1.000        |
|                  | OT [h]               | ≤3.5/>3.5            | 0.56        | 0.16 | 1.97  | 0.81 | 0.51 | 1.28  | 0.528        |

|              |                      |             |             |      |       |             |      |      |              |
|--------------|----------------------|-------------|-------------|------|-------|-------------|------|------|--------------|
|              | SLT [h]              | ≤2.5/>2.5   | 0.62        | 0.18 | 2.16  | 0.84        | 0.53 | 1.34 | 0.537        |
|              | LED increase         | no/yes      | 0.93        | 0.24 | 3.54  | 0.97        | 0.58 | 1.62 | 1.000        |
| MDS-UPDRS IV | Age [y]              | <70/≥70     | 1.27        | 0.38 | 4.29  | 1.11        | 0.66 | 1.85 | 0.763        |
|              | Sex                  | male/female | 1.02        | 0.30 | 3.48  | 1.01        | 0.60 | 1.68 | 1.000        |
|              | H&Y                  | <3/≥3       | 0.59        | 0.17 | 2.01  | 0.80        | 0.48 | 1.33 | 0.537        |
|              | Disease duration [y] | <8/≥8       | 0.33        | 0.09 | 1.18  | 0.64        | 0.37 | 1.08 | 0.124        |
|              | LED [mg]             | <595/≥595   | 0.74        | 0.22 | 2.49  | 0.88        | 0.53 | 1.46 | 0.760        |
|              | MDS-UPDRS I          | <11/≥11     | 0.47        | 0.14 | 1.64  | 0.72        | 0.40 | 1.28 | 0.344        |
|              | MDS-UPDRS II         | <13/≥13     | 2.04        | 0.56 | 7.49  | 1.33        | 0.81 | 2.17 | 0.348        |
|              | MDS-UPDRS III        | <33/≥33     | 1.57        | 0.45 | 5.53  | 1.20        | 0.73 | 1.98 | 0.541        |
|              | MDS-UPDRS IV         | <5/≥5       | <b>0.13</b> | 0.03 | 0.54  | 0.45        | 0.25 | 0.81 | <b>0.005</b> |
|              | PDQ-39               | <30/≥30     | 1.13        | 0.32 | 3.95  | 1.05        | 0.62 | 1.80 | 1.000        |
|              | BDI-II               | <14/≥14     | 2.53        | 0.69 | 9.36  | 1.53        | 0.79 | 2.96 | 0.198        |
|              | AES                  | <11/≥11     | 1.64        | 0.45 | 5.94  | 1.24        | 0.68 | 2.25 | 0.521        |
|              | MoCA                 | ≥26/<26     | 1.22        | 0.32 | 4.63  | 1.09        | 0.64 | 1.85 | 1.000        |
|              | PT [h]               | ≤4.5/>4.5   | 2.55        | 0.72 | 8.96  | 1.46        | 0.88 | 2.45 | 0.216        |
|              | Exercise [h]         | <4.5/≥4.5   | 2.17        | 0.62 | 7.60  | 1.37        | 0.83 | 2.26 | 0.351        |
|              | OT [h]               | ≤3.5/>3.5   | 0.39        | 0.11 | 1.38  | 0.68        | 0.41 | 1.14 | 0.216        |
|              | SLT [h]              | ≤2.5/>2.5   | 0.63        | 0.19 | 2.13  | 0.82        | 0.49 | 1.38 | 0.543        |
|              | LED increase         | no/yes      | 1.97        | 0.50 | 7.82  | 1.30        | 0.79 | 2.13 | 0.503        |
| TUG, n=42    | Age [y]              | <70/≥70     | 0.75        | 0.21 | 2.73  | 0.91        | 0.59 | 1.39 | 0.750        |
|              | Sex                  | male/female | 1.00        | 0.27 | 3.66  | 1.00        | 0.65 | 1.54 | 1.000        |
|              | H&Y                  | <3/≥3       | 0.87        | 0.24 | 3.15  | 0.95        | 0.62 | 1.46 | 1.000        |
|              | Disease duration [y] | <8/≥8       | 1.00        | 0.28 | 3.61  | 1.00        | 0.65 | 1.53 | 1.000        |
|              | LED [mg]             | <595/≥595   | 0.48        | 0.13 | 1.81  | 0.79        | 0.51 | 1.21 | 0.338        |
|              | MDS-UPDRS I          | <11/≥11     | 0.86        | 0.24 | 3.17  | 0.95        | 0.61 | 1.48 | 1.000        |
|              | MDS-UPDRS II         | <13/≥13     | 0.74        | 0.20 | 2.75  | 0.90        | 0.57 | 1.43 | 0.742        |
|              | MDS-UPDRS III        | <33/≥33     | 1.35        | 0.36 | 5.08  | 1.10        | 0.72 | 1.69 | 0.747        |
|              | MDS-UPDRS IV         | <5/≥5       | 0.75        | 0.21 | 2.73  | 0.91        | 0.59 | 1.39 | 0.750        |
|              | PDQ-39               | <30/≥30     | 0.62        | 0.16 | 2.47  | 0.86        | 0.56 | 1.31 | 0.734        |
|              | BDI-II               | <14/≥14     | 0.26        | 0.05 | 1.38  | 0.69        | 0.47 | 1.02 | 0.159        |
|              | AES                  | <11/≥11     | 1.39        | 0.35 | 5.45  | 1.12        | 0.68 | 1.84 | 0.729        |
|              | MoCA                 | ≥26/<26     | 1.00        | 0.24 | 4.14  | 1.00        | 0.62 | 1.61 | 1.000        |
|              | PT [h]               | ≤4.5/>4.5   | 1.33        | 0.37 | 4.85  | 1.10        | 0.72 | 1.69 | 0.750        |
|              | Exercise [h]         | <4.5/≥4.5   | 1.00        | 0.27 | 3.66  | 1.00        | 0.65 | 1.54 | 1.000        |
|              | OT [h]               | ≤3.5/>3.5   | 4.50        | 1.12 | 18.13 | 1.64        | 1.01 | 2.65 | 0.049        |
|              | SLT [h]              | ≤2.5/>2.5   | 0.87        | 0.24 | 3.13  | 0.95        | 0.62 | 1.47 | 1.000        |
|              | LED increase         | no/yes      | 1.18        | 0.29 | 4.83  | 1.06        | 0.68 | 1.66 | 1.000        |
| BBS, n=42    | Age [y]              | <70/≥70     | 0.56        | 0.16 | 1.89  | 0.76        | 0.42 | 1.35 | 0.374        |
|              | Sex                  | male/female | 0.80        | 0.24 | 2.73  | 0.90        | 0.51 | 1.60 | 0.764        |
|              | H&Y                  | <3/≥3       | <b>0.12</b> | 0.03 | 0.49  | <b>0.39</b> | 0.20 | 0.75 | <b>0.002</b> |
|              | Disease duration [y] | <8/≥8       | 1.00        | 0.30 | 3.36  | 1.00        | 0.56 | 1.78 | 1.000        |
|              | LED [mg]             | <595/≥595   | 1.20        | 0.36 | 4.04  | 1.09        | 0.61 | 1.95 | 1.000        |
|              | MDS-UPDRS I          | <11/≥11     | 0.70        | 0.20 | 2.41  | 0.84        | 0.46 | 1.55 | 0.754        |
|              | MDS-UPDRS II         | <13/≥13     | 0.86        | 0.25 | 2.98  | 0.93        | 0.51 | 1.70 | 1.000        |
|              | MDS-UPDRS III        | <33/≥33     | 0.47        | 0.13 | 1.64  | 0.69        | 0.36 | 1.32 | 0.346        |
|              | MDS-UPDRS IV         | <5/≥5       | 1.20        | 0.36 | 4.04  | 1.09        | 0.61 | 1.95 | 1.000        |
|              | PDQ-39               | <30/≥30     | 1.43        | 0.40 | 5.07  | 1.19        | 0.63 | 2.25 | 0.749        |
|              | BDI-II               | <14/≥14     | 0.92        | 0.25 | 3.41  | 0.96        | 0.52 | 1.78 | 1.000        |
|              | AES                  | <11/≥11     | 0.58        | 0.15 | 2.21  | 0.78        | 0.44 | 1.39 | 0.514        |
|              | MoCA                 | ≥26/<26     | 0.88        | 0.23 | 3.34  | 0.94        | 0.49 | 1.81 | 1.000        |
|              | PT [h]               | ≤4.5/>4.5   | 0.83        | 0.25 | 2.80  | 0.92        | 0.51 | 1.64 | 1.000        |
|              | Exercise [h]         | <4.5/≥4.5   | 1.25        | 0.37 | 4.26  | 1.11        | 0.63 | 1.98 | 0.764        |
|              | OT [h]               | ≤3.5/>3.5   | 2.63        | 0.75 | 9.13  | 1.59        | 0.85 | 2.97 | 0.216        |
|              | SLT [h]              | ≤2.5/>2.5   | 2.68        | 0.77 | 9.38  | 1.59        | 0.88 | 2.89 | 0.137        |
|              | LED increase         | no/yes      | 0.70        | 0.19 | 2.59  | 0.84        | 0.43 | 1.64 | 0.741        |



|           |                      |             |      |      |       |      |      |      |       |
|-----------|----------------------|-------------|------|------|-------|------|------|------|-------|
| PPT, n=41 | Age [y]              | <70/≥70     | 0.95 | 0.24 | 3.81  | 0.99 | 0.68 | 1.43 | 1.000 |
|           | Sex                  | male/female | 3.02 | 0.72 | 12.70 | 1.35 | 0.89 | 2.04 | 0.164 |
|           | H&Y                  | <3/≥3       | 0.95 | 0.24 | 3.81  | 0.99 | 0.68 | 1.43 | 1.000 |
|           | Disease duration [y] | <8/≥8       | 2.29 | 0.55 | 9.52  | 1.25 | 0.85 | 1.83 | 0.306 |
|           | LED [mg]             | <595/≥595   | 2.00 | 0.48 | 8.30  | 1.20 | 0.83 | 1.74 | 0.484 |
|           | MDS-UPDRS I          | <11/≥11     | 0.48 | 0.12 | 1.96  | 0.82 | 0.54 | 1.23 | 0.476 |
|           | MDS-UPDRS II         | <13/≥13     | 1.17 | 0.28 | 4.87  | 1.04 | 0.72 | 1.51 | 1.000 |
|           | MDS-UPDRS III        | <33/≥33     | 2.04 | 0.45 | 9.24  | 1.20 | 0.84 | 1.71 | 0.478 |
|           | MDS-UPDRS IV         | <5/≥5       | 0.83 | 0.21 | 3.33  | 0.95 | 0.66 | 1.38 | 1.000 |
|           | PDQ-39               | <30/≥30     | 1.67 | 0.41 | 6.82  | 1.15 | 0.76 | 1.75 | 0.491 |
|           | BDI-II               | <14/≥14     | 1.33 | 0.31 | 5.72  | 1.08 | 0.71 | 1.65 | 0.719 |
|           | AES                  | <11/≥11     | 2.29 | 0.55 | 9.64  | 1.28 | 0.80 | 2.05 | 0.280 |
|           | MoCA                 | ≥26/<26     | 0.75 | 0.18 | 3.22  | 0.92 | 0.61 | 1.41 | 0.719 |
|           | PT [h]               | ≤4.5/>4.5   | 1.53 | 0.37 | 6.35  | 1.12 | 0.78 | 1.61 | 0.726 |
|           | Exercise [h]         | <4.5/≥4.5   | 0.48 | 0.12 | 1.96  | 0.82 | 0.54 | 1.23 | 0.476 |
|           | OT [h]               | ≤3.5/>3.5   | 1.37 | 0.34 | 5.49  | 1.09 | 0.75 | 1.58 | 0.734 |
|           | SLT [h]              | ≤2.5/>2.5   | 7.77 | 1.42 | 42.66 | 1.65 | 1.08 | 2.05 | 0.015 |
|           | LED increase         | no/yes      | 0.44 | 0.10 | 1.84  | 0.78 | 0.49 | 1.26 | 0.280 |

Predictors of Treatment Response at DC in relation to BL examination. If not labeled otherwise, predictor categories refer to total counts in each score. Depicted are odds ratios and relative risk for dichotomized BL parameter function. If not indicated otherwise n=43. y Years, mg Milligrams, h Hours, OR Odds ratio, RR Relative risk, CI Confidence interval, LB Lower bound, UB Upper bound, H&Y modified Hoehn and Yahr stage, MDS-UPDRS I-IV Movement Disorders Society Unified Parkinson's Disease Rating Scale, Parts I-IV, LED Levodopa equivalent dose, PDQ-39 Parkinson's Disease Questionnaire, BDI-II revised Beck Depression Inventory, AES Apathy Evaluation Scale, MoCA Montreal Cognitive Assessment, PT Physiotherapy, OT Occupational therapy, SLT speech and language therapy, significant values with  $p < 0.01$  are printed in bold.
